# Supplementary material for: Serious Adverse Events after a Single Shot of Intrathecal Morphine: A Case Series and Systematic Review
Source: Pain Res Manag. 2022 Mar 10;2022:4567192. doi: 10.1155/2022/4567192 (PMC8930253; doi:10.1155/2022/4567192)
Supplement: Supplementary Materials — A: search strategy. B: case descriptions. C: table of included studies. [file 4567192.f1.zip]

Archive with 3 entries (3 files):
- 4567192.f1/Supplemental data file - cases.docx
- 4567192.f1/Supplemental data file - seach strategy.docx
- 4567192.f1/Supplemental data file - table studies.docx
